# Supplementary material for: Postnatal immune activation causes social deficits in a mouse model of tuberous sclerosis: Role of microglia and clinical implications
Source: PubMed Central journal article supplement — Sci Adv. 2021 Sep 17;7(38):eabf2073. doi: 10.1126/sciadv.abf2073 (PMC8448451; doi:10.1126/sciadv.abf2073), 2021-09-17
Supplement: sciadv.abf2073_sm.pdf [file sciadv.abf2073_sm.pdf]

Supplementary Materials for

**Postnatal immune activation causes social deficits in a mouse model of tuberous sclerosis: Role of microglia and clinical implications**

Manuel F. López-Aranda, Ishanu Chattopadhyay, Gayle M. Boxx, Elizabeth R. Fraley, Tawnie K. Silva, Miou Zhou, Miranda Phan, Isaiah Herrera, Sunrae Taloma, Rochelle Mandanas, Karen Bach, Michael Gandal, Daniel H. Geschwind, Genhong Cheng, Andrey Rzhetsky, Stephanie A. White, Alcino J. Silva\*

\*Corresponding author. Email: [alcinojsilva@gmail.com](mailto:alcinojsilva@gmail.com)

Published 17 September 2021, *Sci. Adv.* 7, eabf2073 (2021)  
DOI: 10.1126/sciadv.abf2073

**The PDF file includes:**

Figs. S1 to S8  
Table S1  
Legend for data file S1

**Other Supplementary Material for this manuscript includes the following:**

Data file S1

## Supplementary Materials

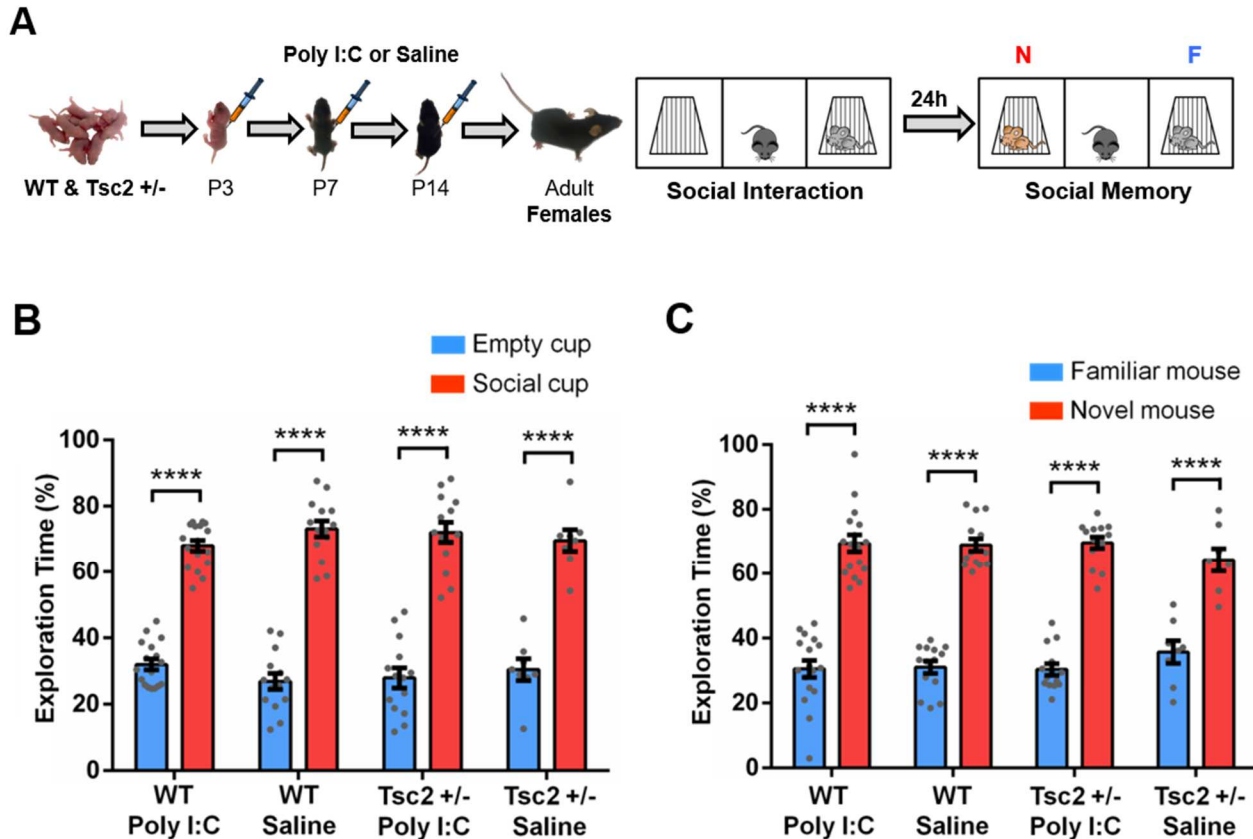

**Fig. S1. Early post-natal immune activation does not induce social memory deficits in adult  $Tsc2^{+/-}$  female mice.**

(A) Time line for injections of Poly I:C or Saline and behavior approach. (B) Female WT/Poly I:C (n=17;  $P < 0.0001$ ,  $t = 15.69$ ), WT/Saline (n=14;  $P < 0.0001$ ,  $t = 13.55$ ),  $Tsc2^{+/-}$ /Poly I:C (n=14;  $P < 0.0001$ ,  $t = 10.39$ ) and  $Tsc2^{+/-}$ /Saline (n=8;  $P < 0.0001$ ,  $t = 8.46$ ) mice show normal social interaction (they spent significantly more time exploring the social cup than the empty cup). Analyses of the data using 2-way ANOVA revealed no significant differences between groups. (C) Female WT/Poly I:C (n=17;  $P < 0.0001$ ,  $t = 10.51$ ), WT/Saline (n=14;  $P < 0.0001$ ,  $t = 13.88$ ),  $Tsc2^{+/-}$ /Poly I:C (n=14;  $P < 0.0001$ ,  $t = 15.60$ ) and  $Tsc2^{+/-}$ /Saline (n=8;  $P < 0.0001$ ,  $t = 5.78$ ) mice show normal social memory (they spent significantly more time exploring the novel mouse than the familiar mouse).

Analyses of the data using 2-way ANOVA revealed no significant differences between groups.

Data represent means  $\pm$  SEM as well as individual data.

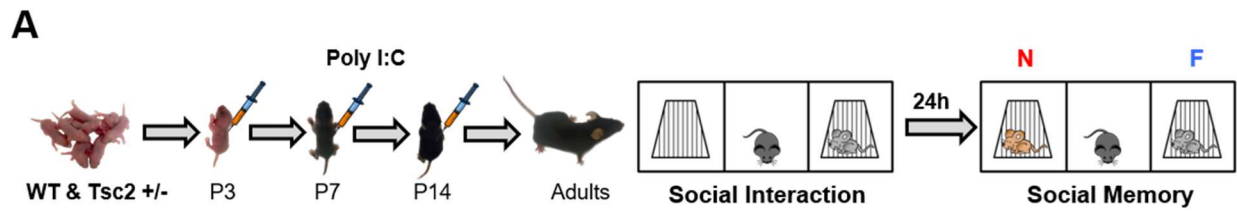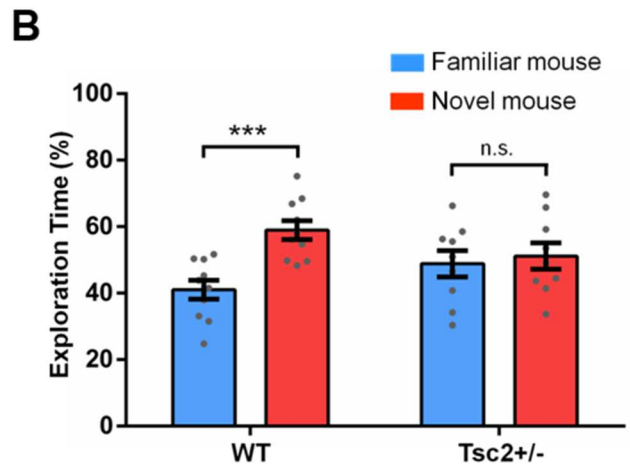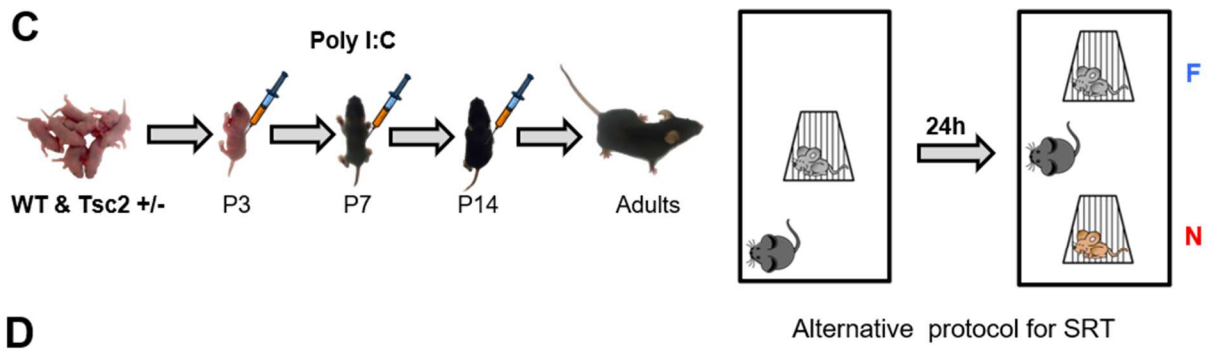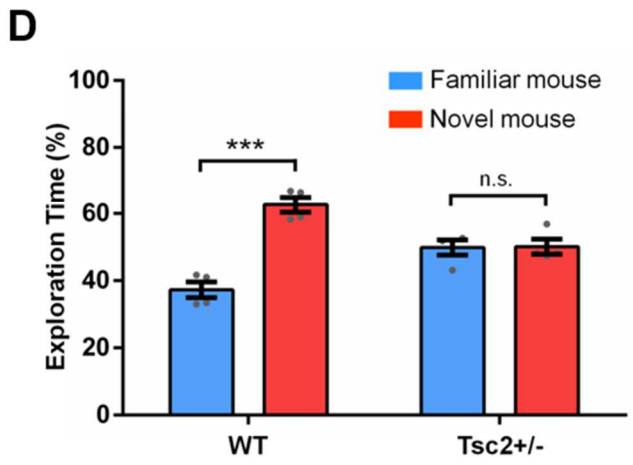

**Fig. S2. Confirmation by a second researcher and with an alternative protocol of social memory deficits in Tsc2<sup>+/-</sup> male mice injected with Poly I:C early post-natally.**

(A and C) Time line for injections of Poly I:C and behavior approach. (B) WT/Poly I:C (n=10;  $P < 0.001$ ,  $t = 4.42$ ) show normal social memory.  $Tsc2^{+/-}$ /Poly I:C (n=9;  $P = 0.68$ ,  $t = 0.41$ ) show social memory deficit. (D) WT/Poly I:C (n=4;  $P < 0.001$ ,  $t = 7.62$ ) show normal social memory.  $Tsc2^{+/-}$ /Poly I:C (n=4;  $P = 0.93$ ,  $t = 0.08$ ) show social memory deficit. Data represent means  $\pm$  SEM as well as individual data.

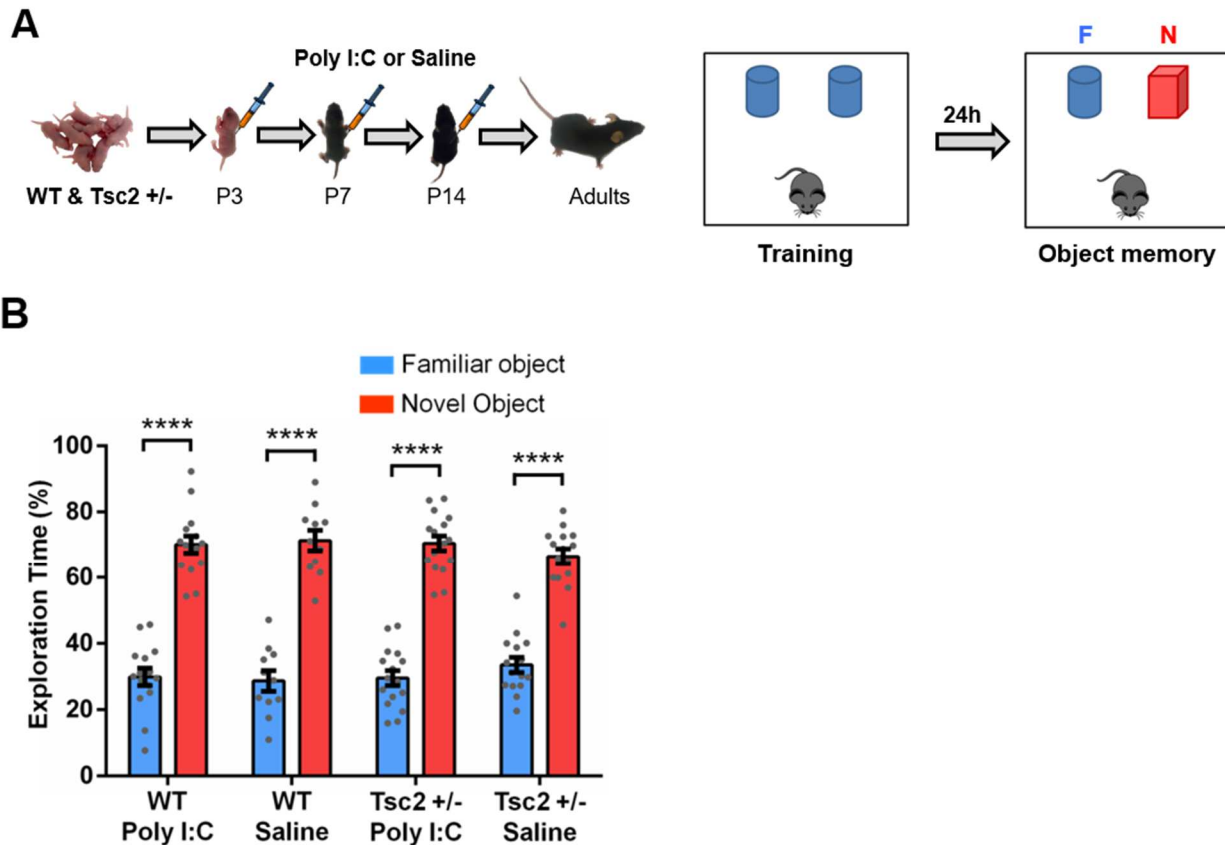

**Fig. S3. Early post-natal immune activation does not affect object memory on  $Tsc2^{+/-}$  male mice.**

(A) Time line for injections of Poly I:C or Saline and behavior approach. (B) WT/Poly I:C (n=15;  $P < 0.0001$ ,  $t = 10.86$ ), WT/Saline (n=11;  $P < 0.0001$ ,  $t = 9.60$ ),  $Tsc2^{+/-}$ /Poly I:C (n=16;  $P < 0.0001$ ,  $t = 12.75$ ) and  $Tsc2^{+/-}$ /Saline (n=15;  $P < 0.0001$ ,  $t = 10.30$ ) mice show normal object memory (they spent significantly more time exploring the novel object than the familiar object). Analyses of the data using 2-way ANOVA revealed no significant differences between groups. Data represent means  $\pm$  SEM as well as individual data.

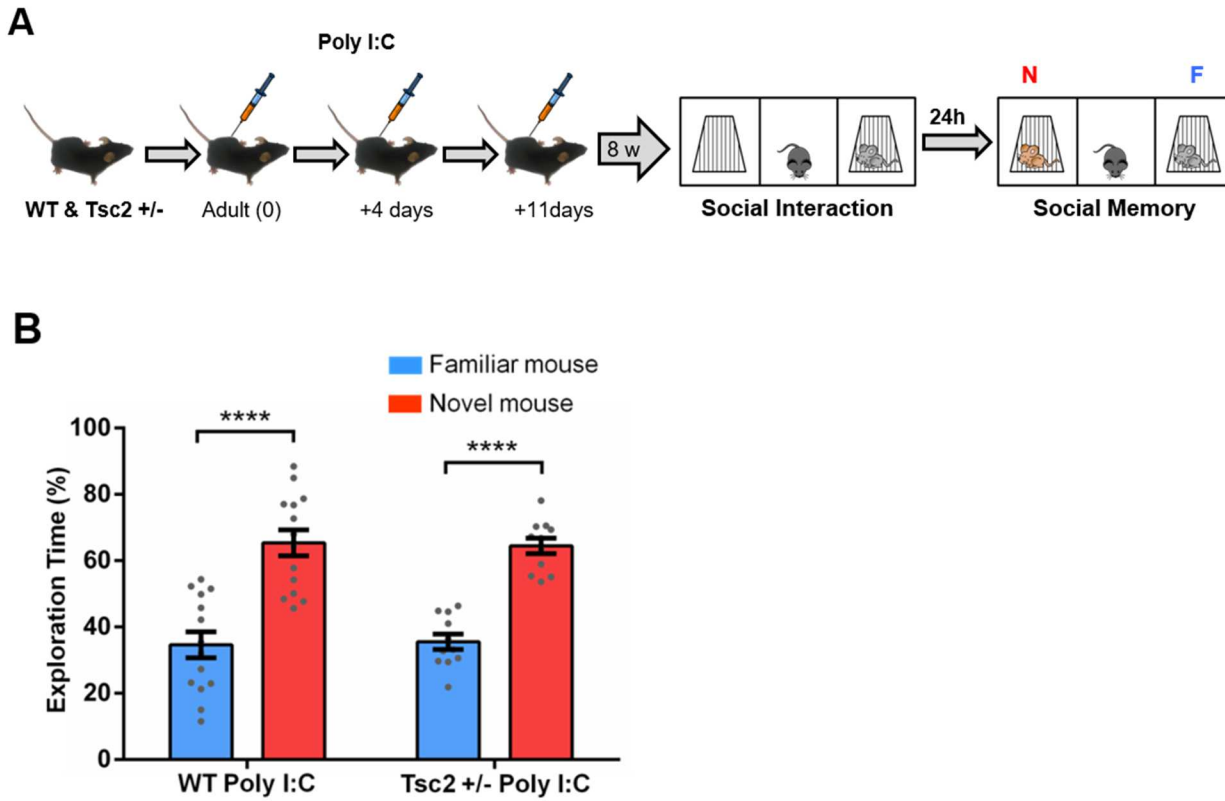

**Fig. S4. Immune activation in adult  $Tsc2^{+/-}$  male mice does not trigger a long lasting social memory deficit.**

(A) Time line for injections of Poly I:C and behavior approach. (B) Both, WT ( $n=14$ ;  $P<0.0001$ ,  $t=5.51$ ) and  $Tsc2^{+/-}$  ( $n=11$ ;  $P<0.0001$ ,  $t=8.66$ ) mice injected with Poly I:C as adults and tested 8 weeks later, show normal social memory. Data represent means  $\pm$  SEM as well as individual data.

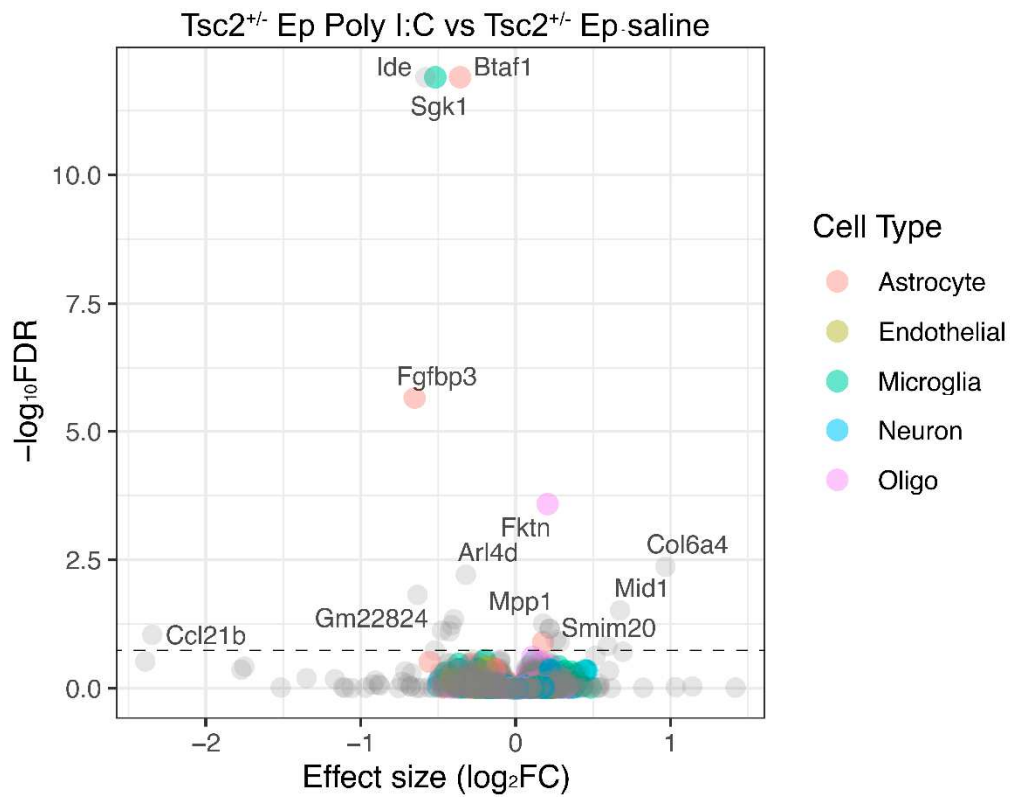

**Fig. S5. Gene expression changes in the brain of Tsc2<sup>+/-</sup> male mice with early post-natal immune activation.**

Volcano plot shows differential gene expression for Poly I:C vs saline exposed Tsc2<sup>+/-</sup> mice at ~4 months age, across prefrontal cortex, hippocampus, and cerebellum. Genes are colored according to cell-type specificity in mouse brain.



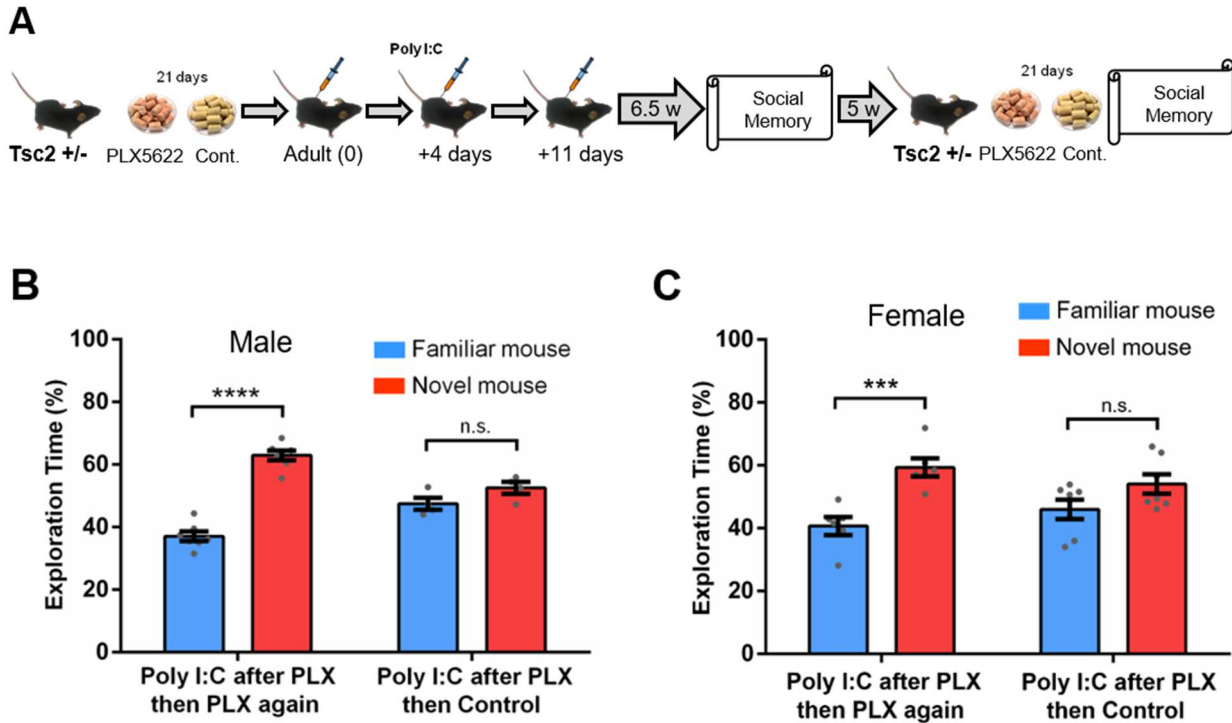

**Fig. S6. Depletion of the microglia activated by the Poly I:C injections during microglia repopulation rescued the social memory phenotype of  $TSC2^{+/-}$  mice.**

(A) Time line for injections of Poly I:C, treatment with PLX or control chow and behavior approach. (B) Male  $Tsc2^{+/-}$ /Poly I:C after PLX then PLX again ( $n=7$ ;  $P<0.0001$ ,  $t=12.02$ ) show normal social memory.  $Tsc2^{+/-}$ /Poly I:C after PLX then Control chow ( $n=4$ ;  $P=0.108$ ,  $t=1.88$ ) show social memory deficit. (C) Female  $Tsc2^{+/-}$ /Poly I:C after PLX then PLX again ( $n=6$ ;  $P<0.001$ ,  $t=4.63$ ) mice show normal social memory.  $Tsc2^{+/-}$ /Poly I:C after PLX then Control chow ( $n=7$ ;  $P=0.089$ ,  $t=1.84$ ) mice show social memory deficit. Data represent means  $\pm$  SEM as well as individual data.

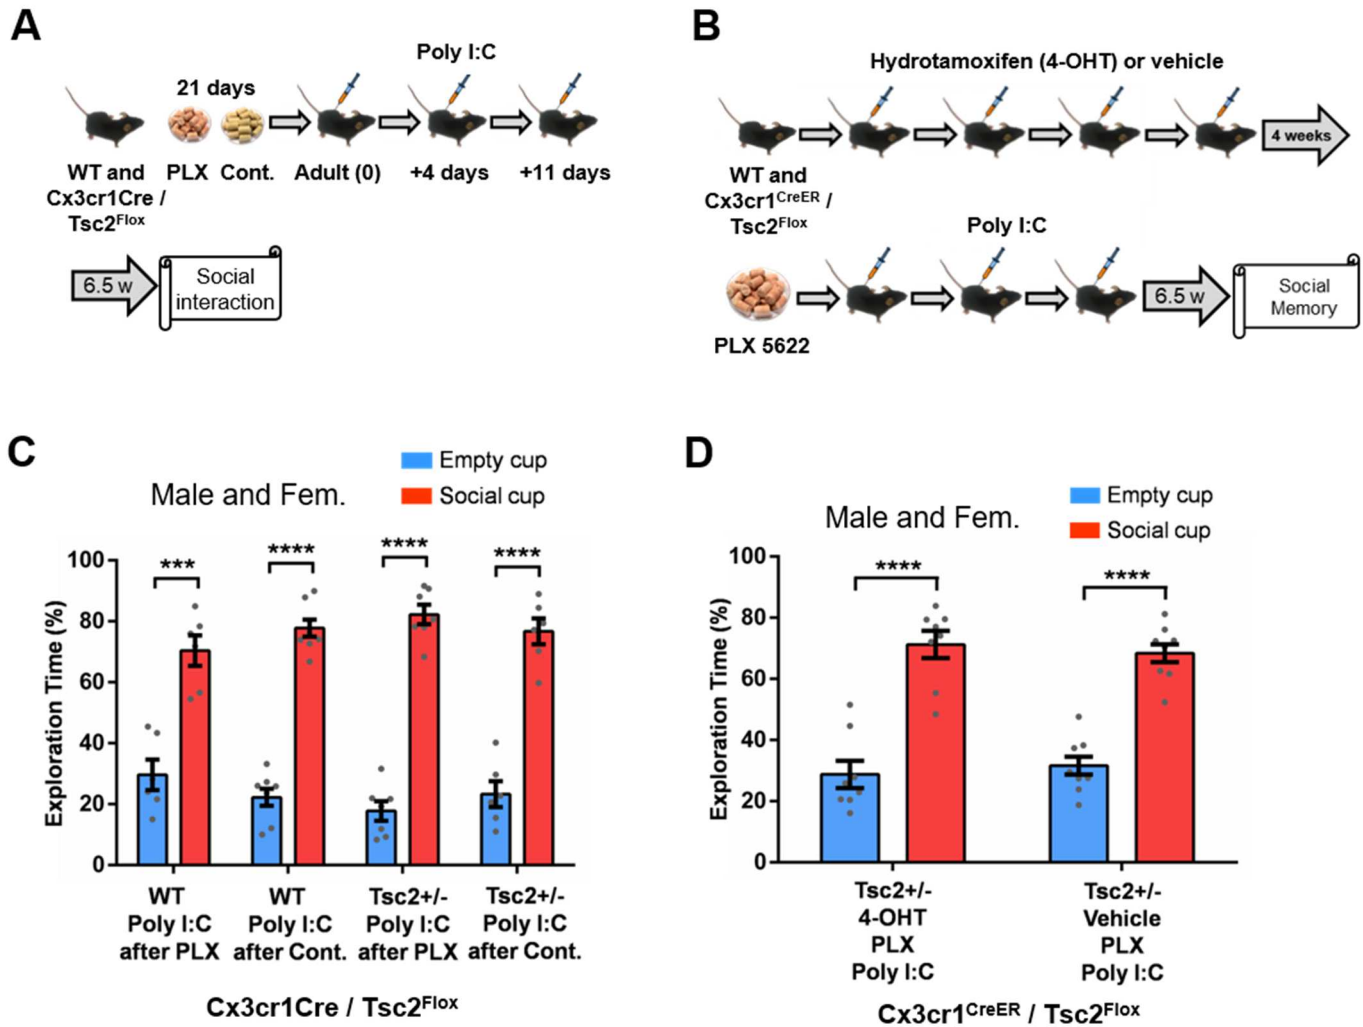

**Fig. S7. Immune activation during the repopulation of microglia does not induce Social interaction deficits in  $Cx3cr1^{Cre} / Tsc2^{Flox}$  or  $Cx3cr1^{ER} / Tsc2^{Flox}$  mice**

(A) Time line for injections of Poly I:C, treatment with PLX5622 (PLX; depletes microglia) or Control chow and behavior approach. (B) Time line for injections of 4-Hydroxytamoxifen or vehicle and Poly I:C, treatment with PLX and behavior approach. (C) Male and Female WT/Poly I:C after PLX (n=6;  $P < 0.001$ ,  $t = 5.75$ ), WT/Poly I:C after Control chow (n=8;  $P < 0.0001$ ,  $t = 14.12$ ),  $Tsc2^{+/-}$ /Poly I:C after PLX (n=7;  $P < 0.0001$ ,  $t = 14.38$ ) and  $Tsc2^{+/-}$ /Poly I:C after Control chow (n=6;  $P < 0.0001$ ,  $t = 8.85$ ) mice show normal social interaction. Analyses of the data using 2-way ANOVA revealed no significant differences between groups. (D) Male and Female  $Cx3cr1^{CreER} / Tsc2^{Flox}$  /4-OHT mice injected with Poly I:C after PLX (n=8;  $P < 0.0001$ ,  $t = 6.75$ ) and  $Cx3cr1^{CreER} / Tsc2^{Flox}$

/Vehicle mice injected with Poly I:C after PLX (n=9;  $P<0.0001$ ,  $t=8.96$ ) show normal social interaction. Data represent means  $\pm$  SEM as well as data for individual mice. As indicated, in figure (C)  $Tsc2^{+/-}$  represents  $Cx3cr1^{Cre}-Tsc2^{Flox}$ . In figure (D)  $Tsc2^{+/-}$  represents  $Cx3cr1^{CreER}/Tsc2^{Flox}$ .

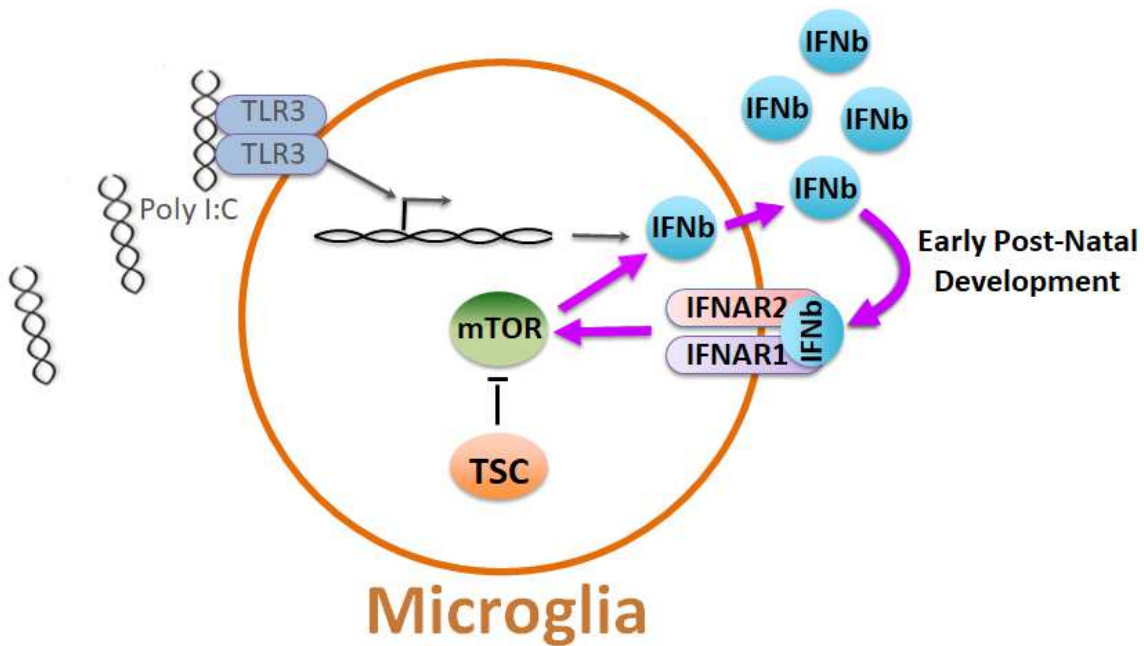

**Fig. S8. Model for the mechanism responsible for the social memory deficits in  $Tsc2^{+/-}$  Ep mice.**

We propose that the Poly I:C injection during early post-natal, trigger an exacerbated production of IFN $\beta$  (type I IFN) in  $Tsc2^{+/-}$  mice caused by their elevated levels of mTOR. Then, IFN $\beta$  activates IFNAR1, which in turn activates the mTOR pathway, and consequently triggers even more IFN production. We propose that this cycle is perpetuated in microglia and it is responsible for the social memory deficits we observed in  $Tsc2^{+/-}$  Ep mice. Importantly, blocking this cycle in adults with rapamycin (m-TOR inhibitor) permanently rescues the social memory deficits of the  $Tsc2^{+/-}$  Ep mice.

| SYMBOL               | logFC      | AveExpr    | t          | P.Value    | FDR.<br>adjusted. P | Direction          |
|----------------------|------------|------------|------------|------------|---------------------|--------------------|
| <b>Col6a4</b>        | 0.96700838 | 0.25547203 | 4.47999992 | 4.21E-05   | 0.00431595          | <b>upregulated</b> |
| <b>Mid1</b>          | 0.67423705 | 2.83698473 | 4.02270745 | 0.00018995 | 0.03044891          | <b>upregulated</b> |
| <b>RP23-468D17.1</b> | 0.21947736 | 3.21036637 | 3.75636028 | 0.00044246 | 0.06930776          | <b>upregulated</b> |
| <b>Smim20</b>        | 0.21928455 | 3.75043663 | 3.75616346 | 0.00044273 | 0.06933948          | <b>upregulated</b> |
| <b>Fktn</b>          | 0.20660018 | 5.67793925 | 5.0154018  | 6.73E-06   | 0.00026002          | <b>upregulated</b> |
| <b>Mpp1</b>          | 0.17756655 | 4.7553308  | 3.84432726 | 0.00033561 | 0.05522782          | <b>upregulated</b> |

**Table S1. Upregulated genes in the brain of  $Tsc2^{+/-}$  male mice with early post-natal immune activation.**

Known markers of microglia were significantly enriched among upregulated genes in  $Tsc2^{+/-}$  Ep male mice.

**Data file S1.** Full summary statistic for all differential expression results from RNAseq analysis.
